# Supplementary material for: Tandem RNA binding sites induce self-association of the stress granule marker protein TIA-1
Source: PubMed Central journal article supplement (PMC7969032; doi:10.1093/nar/gkab080), 2021-02-24
Supplement: gkab080_supplemental_file.pdf [file gkab080_supplemental_file.pdf]

## **SUPPLEMENTARY DATA**

### **Tandem RNA binding sites induce self-association of the stress granule marker protein TIA-1**

Fionna E. Loughlin, Danella L. West, Menachem J. Gunzburg, Saboora Waris, Simon A. Crawford, Matthew C.J. Wilce and Jacqueline A. Wilce

**Supplementary Figure 1. Sequence specific multisite RNA and DNA induces liquid-liquid phase separation of TIA-1**

**Supplementary Figure 2. Nucleic acid containing multiple TIA-1 binding sites induced fibril formation of TIA-1.**

**Supplementary Figure 3. SAXS analysis shows slight elongation of TIA-1 on binding ssRNA UC1 and ssDNA TC1 (Active voice caption)**

**Supplementary Figure 4. The ratio of TIA-1 protein:tandem binding sites finely tunes liquid-liquid phase separation and fibril formation.**

**Supplementary Table 1. Nucleic acids used in this study**

**Supplementary Table 2. Absorption values in  $C_{\text{sat}}$  measurements from Figure 1**

**Supplementary Table 3. Absorption values in  $C_{\text{sat}}$  measurements from Figure 4**

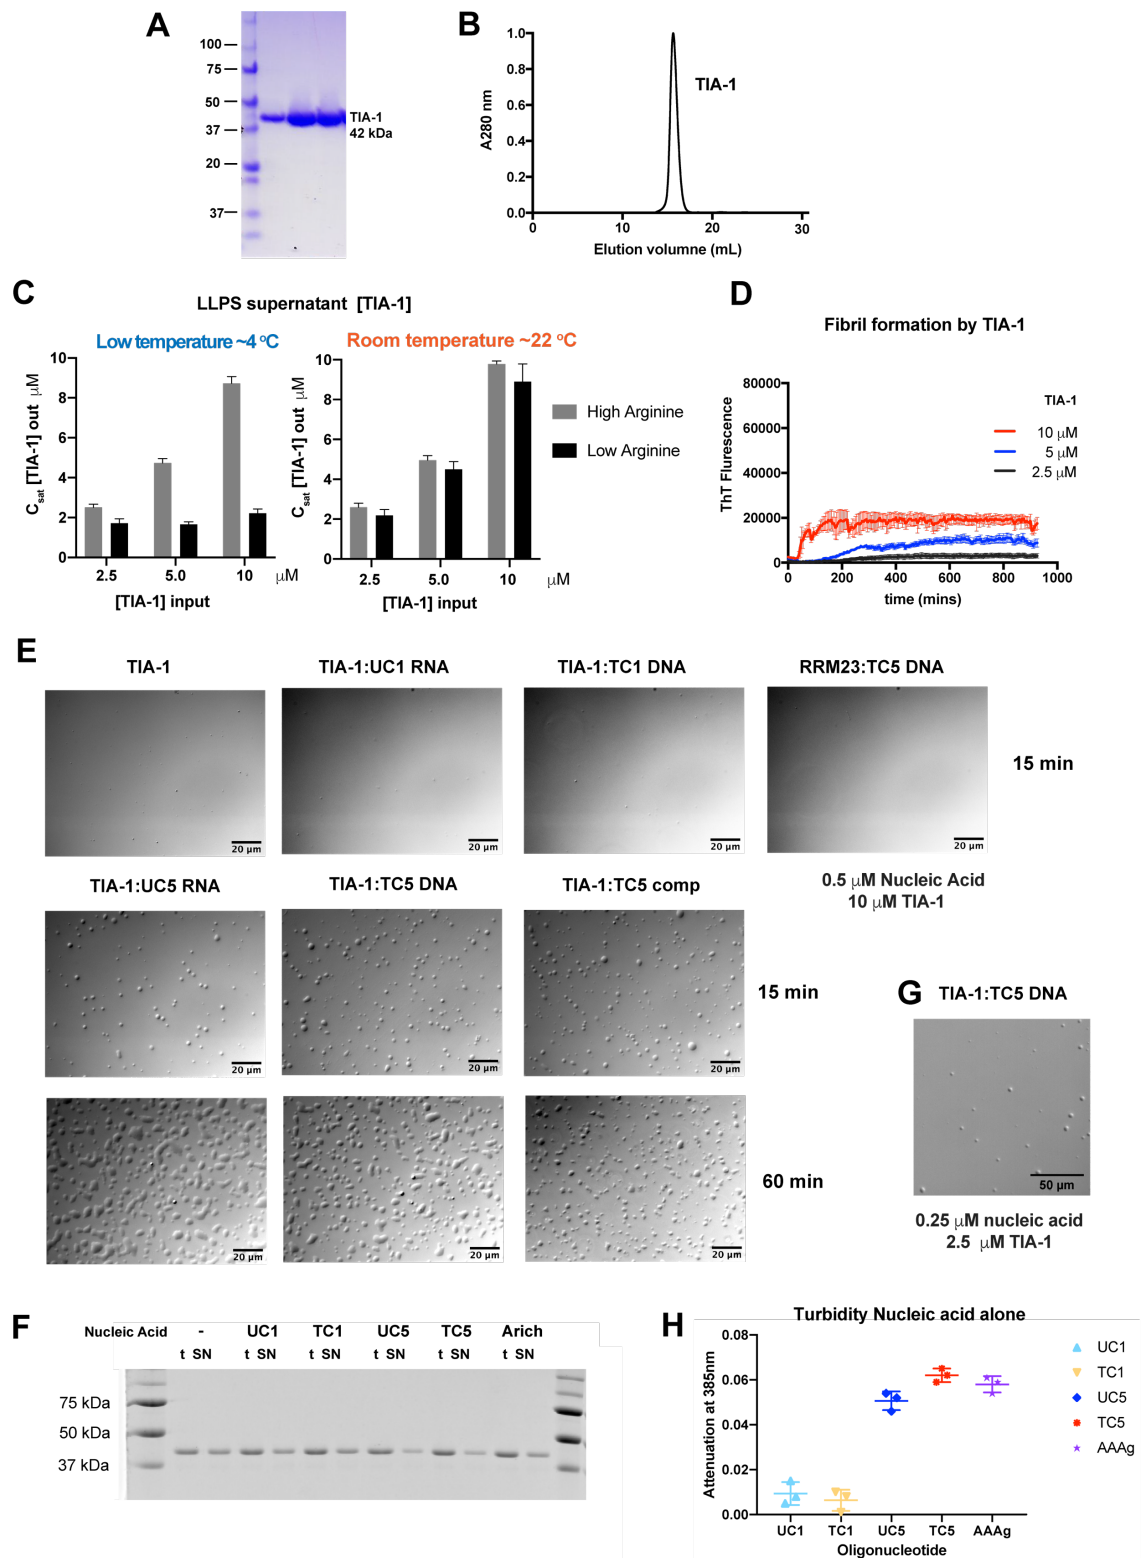

**Supplementary Figure 1. Sequence specific multisite RNA and DNA induces liquid-liquid phase separation of TIA-1.** A) SDS-PAGE of purified TIA-1, B) Size exclusion of TIA-1, C) The concentration of TIA-1 protein remaining dispersed in supernatant solution ( $C_{sat}$ ) after phase separation at 4 °C or room temperature. D) Thioflavin T fluorescence monitoring aggregation of TIA-1 protein at 30 °C. E) DIC microscopy of TIA-1 (10  $\mu$ M) alone or in the presence of nucleic acids (0.5  $\mu$ M). F) SDS-PAGE analysis of TIA-1 protein dispersed in

supernatant solution (t: total sample, SN: supernatant after spin) shows depletion of TIA-1 protein in supernatant. G) DIC microscopy of TIA-1 (2.5  $\mu\text{M}$ ) in the presence of TC5 (0.25  $\mu\text{M}$ ). H) Turbidity measurements of nucleic acid alone. Assays show 3 replicates and error bars representing S.D.

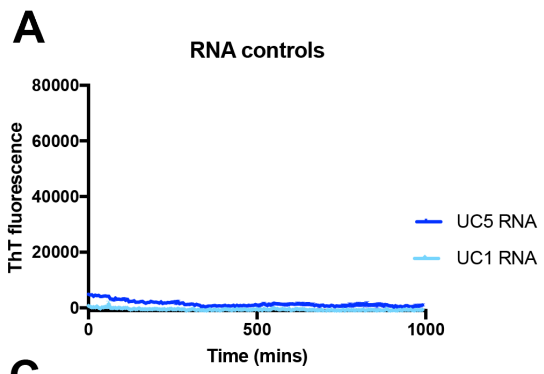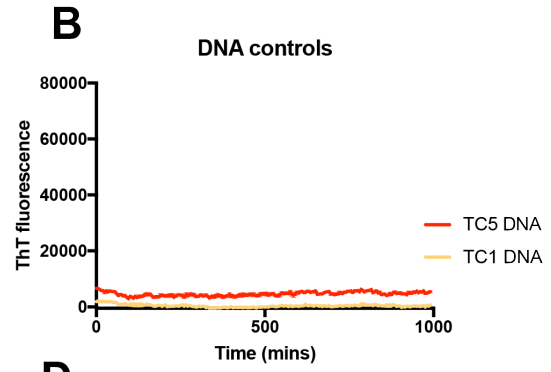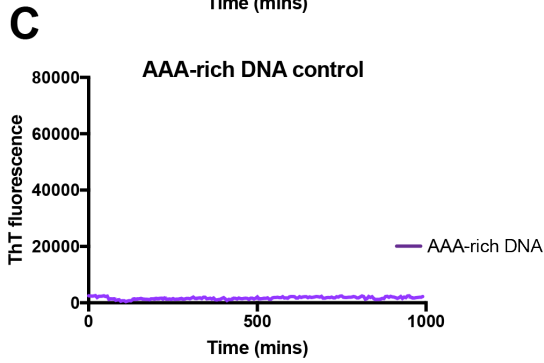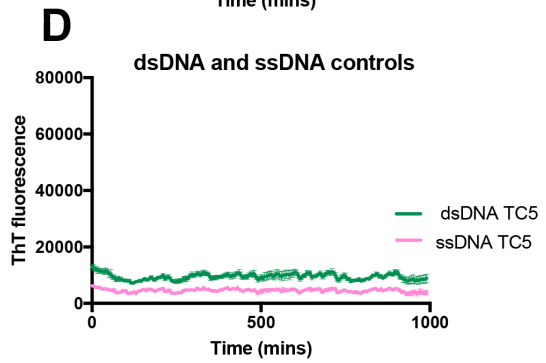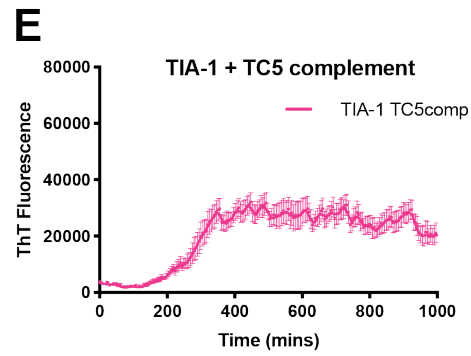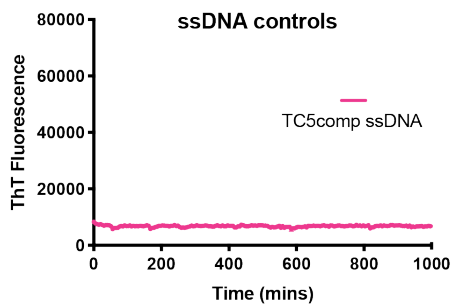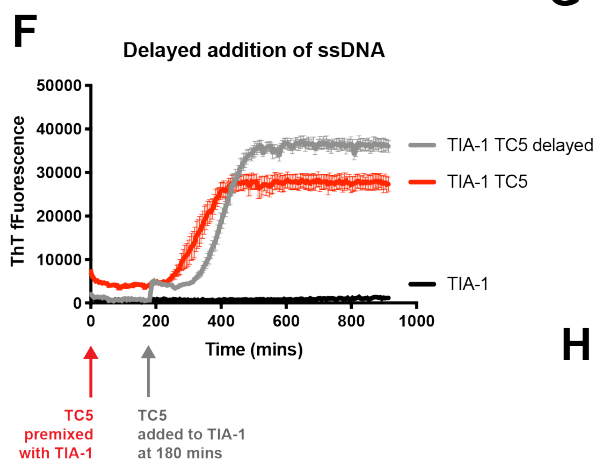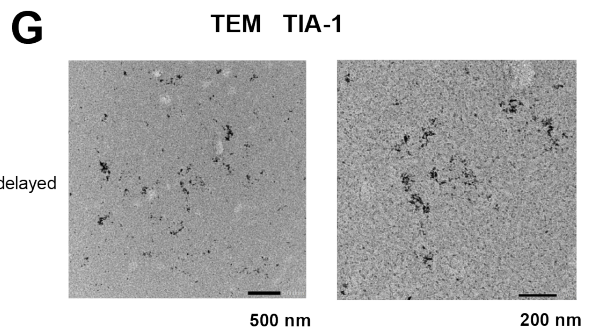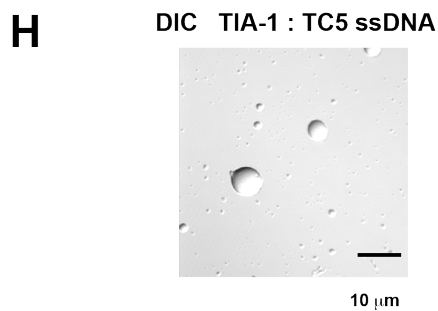

**Supplementary Figure 2. Nucleic acid containing multiple TIA-1 binding sites induced fibril formation of TIA-1.** A-D ) ThT fluorescence measurements of nucleic acid alone used in Figure 1 A-D. A) ssRNA UC1 (*light blue*) and UC5 (*blue*), B) ssDNA TC1 (*yellow*) and TC5 (*red*), C) ss AAA-rich DNA (*purple*), D) dsDNA dsTC5 (*green*) and ssDNA TC5 (*pink*). E) ThT fluorescence measurement of TIA-1 in presence of ssDNA TC5 complement (left) and ssDNA TC5 complement alone (right). F) Comparison of TIA-1 pre-mixed with TC5 (*red*) or adding TC5 after 200 minutes (*grey*). G) Representative TEM images TIA-1 alone showing no fibril formation by TIA-1 at 2.5  $\mu\text{M}$  in 20 mM HEPES pH 7.2, 50 mM NaCl, 40 mM Arginine. H) DIC microscopy of TIA-1 TC5 ssDNA from ThT assay after  $\sim 10$  hours showing the presence of phase separated liquid droplets.

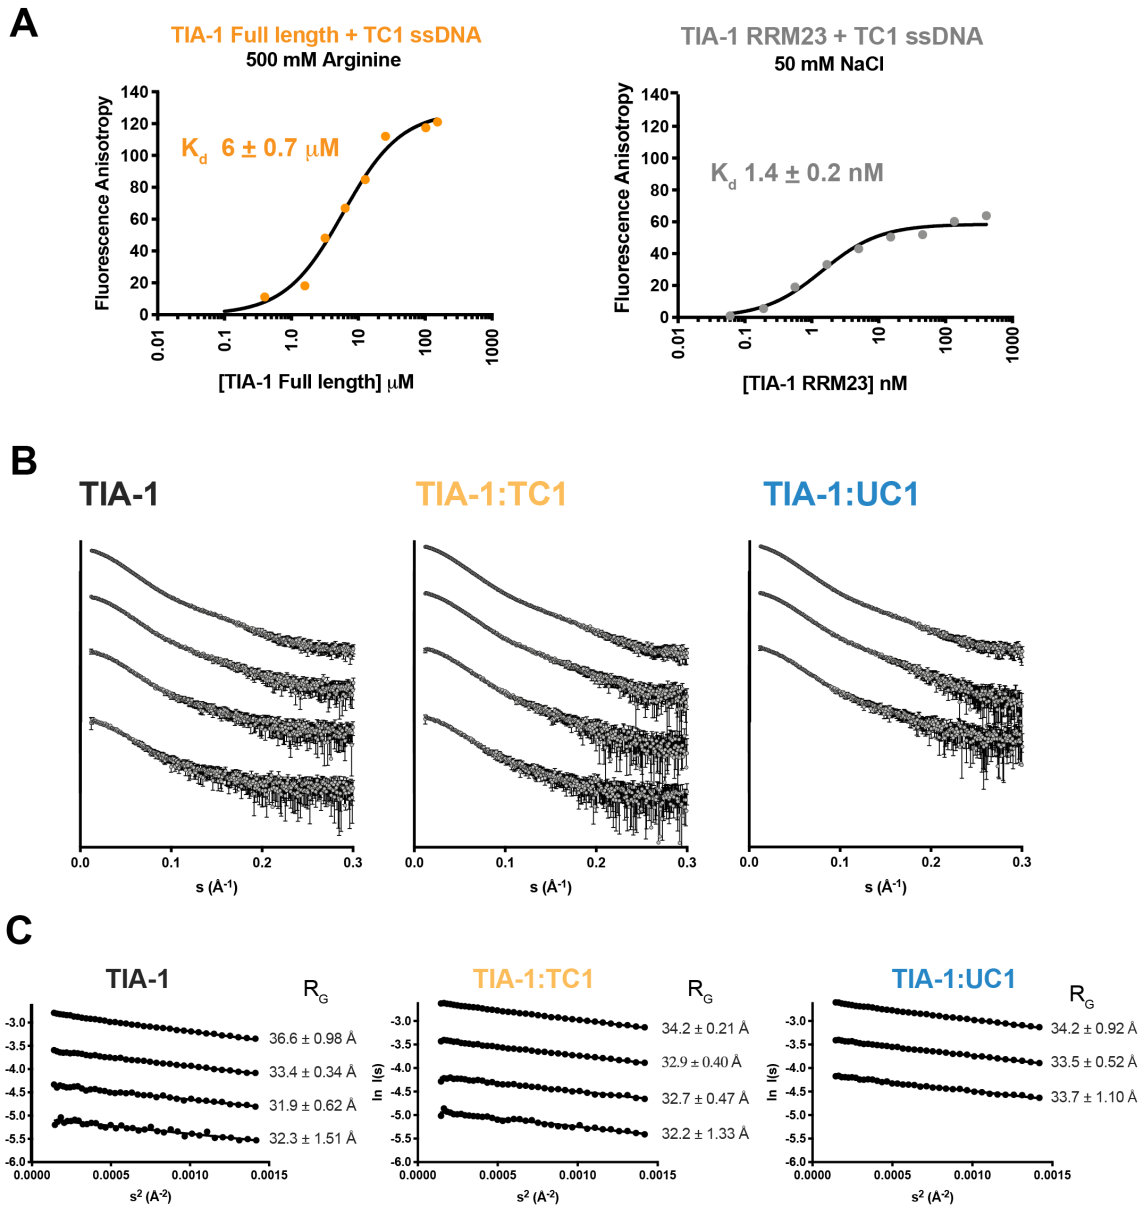

**Supplementary Figure 3. SAXS analysis shows slight conformational change of TIA-1 on binding ssRNA UC1 and ssDNA TC1.** A) Fluorescence anisotropy of TIA-1 full length binding to Fl-TC1 in size exclusion buffer (20 mM Sodium phosphate, 60 mM KCl, 0.5 M Arginine-HCl, 1mM MgCl<sub>2</sub>, 2 mM DTT, 0.5 mM EDTA, pH 7) compared to TIA-1 RRM23 binding to the same oligonucleotide in aggregation buffer (20 mM HEPES, 50 mM NaCl 1 mM DTT). B) Experimental scattering profiles of TIA-1 alone and in complex with ssDNA TC1 and ssRNA UC1 obtained by plotting the log of scattering intensity [ $\log I(s)$ ] as a function of forward scattering vector in the units of  $\text{\AA}^{-1}$  with grey spheres and black error bars representing the  $\pm$  SD. C) Guinier Plots of TIA-1 and nucleic acid complexes and  $R_G$  over concentrations ranges 0.37, 0.73, 1.5, 2.9 mg/mL

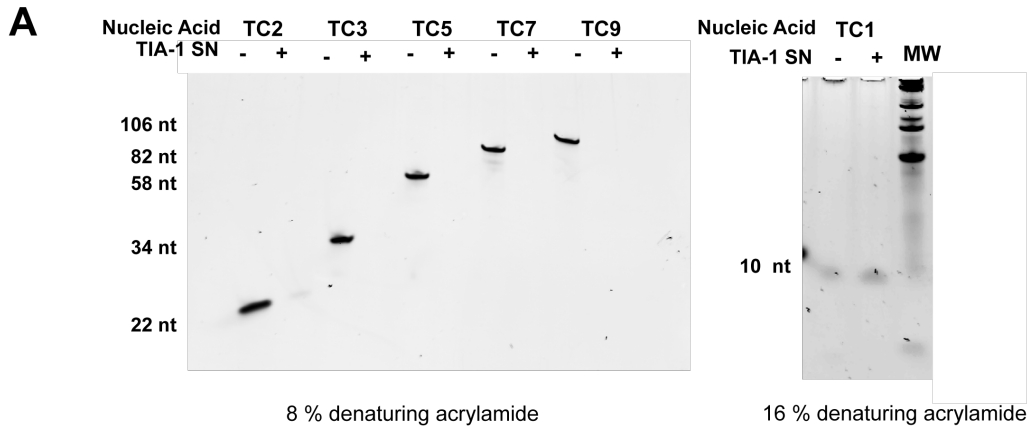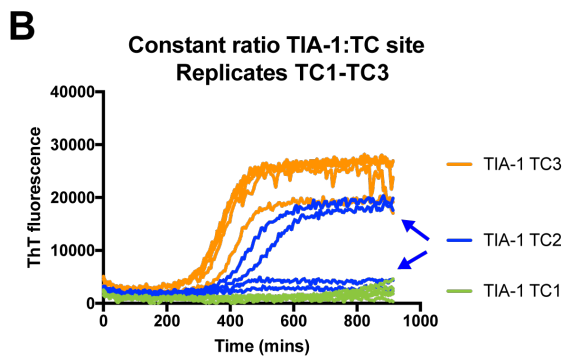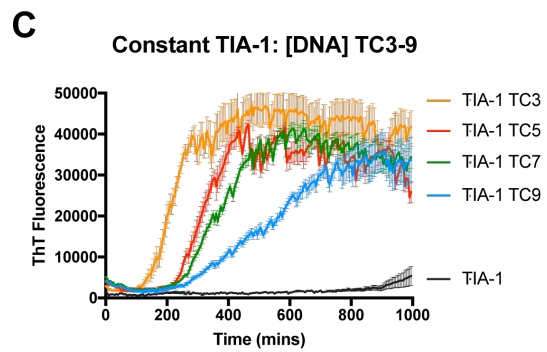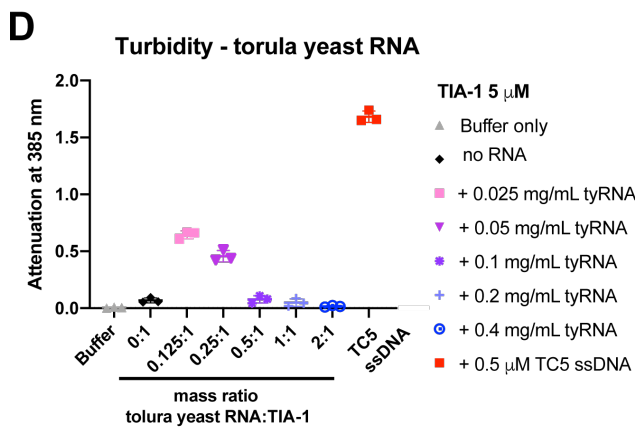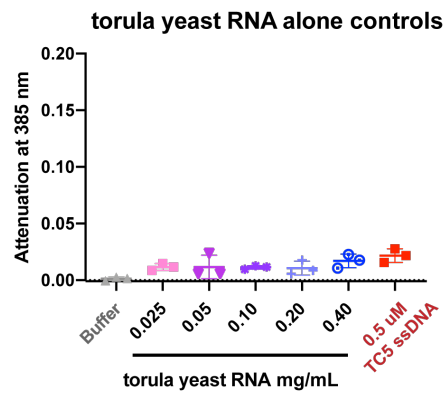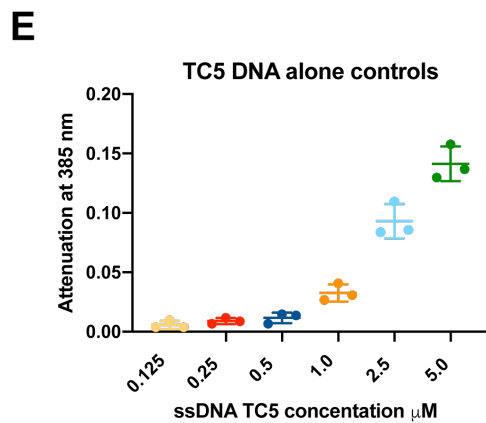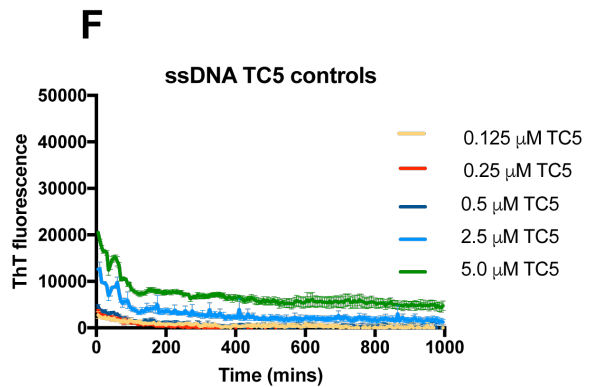

**Supplementary Figure 4. The ratio of TIA-1 protein: binding sites finely tunes liquid-liquid phase separation and fibril formation.** A) Denaturing PAGE gels showing ssDNA in input (-) and in supernatant (-) from  $C_{sat}$  experiments. B&C) ThT assay of TIA-1 with ssDNA at constant TC binding site concentrations: B) TC1-3 showing individual replicates. C) ThT assay of TIA-1 in presence of TC3-TC9 at the same molar ratio. D) Turbidity assay of TIA-1 (5  $\mu$ M) with increasing amounts of tolura yeast RNA or TC5 ssDNA (0.5  $\mu$ M) *left* and controls for nucleic acid alone, *right*. E&F) Control of ssDNA alone: E) ThT assay of ssDNA alone for increasing TC5 concentration. F) Turbidity of ssDNA alone for increasing TC5 concentration.

**Supplementary Table 1. Nucleic acids used in this study**

| Nucleic acid      | nt        | sequence                                                                                                                                                                                                                                                                                                                                                                                                                                            | # TC sites |
|-------------------|-----------|-----------------------------------------------------------------------------------------------------------------------------------------------------------------------------------------------------------------------------------------------------------------------------------------------------------------------------------------------------------------------------------------------------------------------------------------------------|------------|
|                   |           | <b>DNA</b>                                                                                                                                                                                                                                                                                                                                                                                                                                          |            |
| TC1               | 10        | TTTTTACTCC                                                                                                                                                                                                                                                                                                                                                                                                                                          | 1          |
| TC1.5             | 15        | TTTTTTTTTACTCC                                                                                                                                                                                                                                                                                                                                                                                                                                      | 1          |
| TC2               | 22        | TTTTTACTCCAATTTTTACTCC                                                                                                                                                                                                                                                                                                                                                                                                                              | 2          |
| TC3               | 34        | TTTTTACTCCAATTTTTACTCCAATTTTTACTCC                                                                                                                                                                                                                                                                                                                                                                                                                  | 3          |
| TC5               | 58        | TTTTTACTCCAATTTTTACTCCAATTTTTACTCCAATTTTTACTCCAATTTTTACTCC                                                                                                                                                                                                                                                                                                                                                                                          | 5          |
| TC7               | 82        | TTTTTACTCCAATTTTTACTCCAATTTTTACTCCAATTTTTACTCCAATTTTTACTCCAA<br>TTTTTACTCCAATTTTTACTCC                                                                                                                                                                                                                                                                                                                                                              | 7          |
| TC9               | 106       | TTTTTACTCCAATTTTTACTCCAATTTTTACTCCAATTTTTACTCCAATTTTTACTCCAA<br>TTTTTACTCCAATTTTTACTCCAATTTTTACTCCAATTTTTACTCC                                                                                                                                                                                                                                                                                                                                      | 9          |
| Arich             |           | AAAAAAAAAAGAGAAAAAAAAAAGAGAAAAAAAAAAGAGAAAAAAAAAAGAGAAAAAAAAA                                                                                                                                                                                                                                                                                                                                                                                       | 0          |
| dsTC5             | 58 x<br>2 | TTTTTACTCCAATTTTTACTCCAATTTTTACTCCAATTTTTACTCCAATTTTTACTCC<br>AAAAATGAGGTTAAAAATGAGGTTAAAAATGAGGTTAAAAATGAGGTTAAAAATGAGG                                                                                                                                                                                                                                                                                                                            | 5          |
| TC5 comp          |           | AAAAATGAGGTTAAAAATGAGGTTAAAAATGAGGTTAAAAATGAGGTTAAAAATGAGG                                                                                                                                                                                                                                                                                                                                                                                          |            |
|                   |           | <b>RNA</b>                                                                                                                                                                                                                                                                                                                                                                                                                                          |            |
| UC1               | 10        | UUUUUACUCC                                                                                                                                                                                                                                                                                                                                                                                                                                          | 1          |
| UC5               | 58        | UUUUUACUCCAAUUUUUACUCCAAUUUUUACUCCAAUUUUUACUCCAAUUUUUACUCC                                                                                                                                                                                                                                                                                                                                                                                          | 5          |
| P53 3' UTR site 1 | 14        | UUUUUUACCUUGUA                                                                                                                                                                                                                                                                                                                                                                                                                                      | 1          |
| P53 3' UTR site 2 | 27        | UUUUUUUUUUUUUACCCUUUUUAUA                                                                                                                                                                                                                                                                                                                                                                                                                           | 2          |
| P53 3' UTR wt     | 326       | Gggucccuucugcugcc <u>uuuuuuaccuug</u> uagcuag<br>ggcucagccccucucugaguagugguuccuggccaaguugggaaauagguugauagu<br>gucaggucucugcuggcccagcgaaaauucuauccagccaguugugaccucggcaccua<br>caaugaaaucacaccuaccccacaccucugaagauucuaucugggcccucauaggguc<br>cauauccuccagggccuacuuccuuccauucugcaaagccugucugcauuuauccaccc<br>cccaccucugucucccuc <u>uuuuuuuuuuuuuacccuuuuu</u> auauaucaa                                                                                |            |
| P53 3' UTR mut    | 326       | Gggucccuucugcugcc <u>u<u>u</u>g<u>u</u>a<u>u</u>accuag</u> uagcuag<br>ggcucagccccucucugaguagugguuccuggccaaguugggaaauagguugauagu<br>gucaggucucugcuggcccagcgaaaauucuauccagccaguugugaccucggcaccua<br>caaugaaaucacaccuaccccacaccucugaagauucuaucugggcccucauaggguc<br>cauauccuccagggccuacuuccuuccauucugcaaagccugucugcauuuauccaccc<br>cccaccucugucucccuc <u>u<u>u</u>g<u>u</u>a<u>u</u>g<u>u</u>a<u>u</u>g<u>u</u>a<u>u</u>acccucg<u>u</u>uu</u> auauaucaa |            |



|                                    |  | <i>DNA for preparing 3' UTR RNA templates</i>                                                                                                                                                                                                                                                                                                                                                   |  |
|------------------------------------|--|-------------------------------------------------------------------------------------------------------------------------------------------------------------------------------------------------------------------------------------------------------------------------------------------------------------------------------------------------------------------------------------------------|--|
| <b>P53 3'UTR wt DNA template</b>   |  | GCTTAATACGACTCACTATAGgggtcccttctgctgcc <u>tttttaccttg</u> tagctag<br>ggctcagccccctctctgagtagtggttcctggccaagtggggaataggtgatagtt<br>gtcagggtctctgctggcccagcgaaattctatccagccagttggtggaccctggcaccta<br>caatgaaatctcaccctacccacacccctgtaagattctatcttgggcccctcatagggtc<br>catatcctccagggcctactttccttccattctgcaaagcctgtctgcatttatccacc<br>cccaccctgtctccctc                                            |  |
| <b>P53 3' UTR mut DNA template</b> |  | GCTTAATACGACTCACTATAGgggtcccttctgctgcc <u>tatgtaacctag</u> tagctag<br>ggctcagccccctctctgagtagtggttcctggccaagtggggaataggtgatagtt<br>gtcagggtctctgctggcccagcgaaattctatccagccagttggtggaccctggcaccta<br>caatgaaatctcaccctacccacacccctgtaagattctatcttgggcccctcatagggtc<br>catatcctccagggcctactttccttccattctgcaaagcctgtctgcatttatccacc<br>cccaccctgtctccctc <u>tatgtatgtatgta</u> accctgattatataatcaa |  |
| <b>P53 Fwd primer</b>              |  | GCTTAATACGACTCACTATAG                                                                                                                                                                                                                                                                                                                                                                           |  |
| <b>P53 wt Rev primer</b>           |  | ttgatataataaaaaggggtaaaaaaaaaaaaaaagaggggagacaggggtggg                                                                                                                                                                                                                                                                                                                                          |  |
| <b>P53 mut Rev primer</b>          |  | ttgatataataatcaggggttac                                                                                                                                                                                                                                                                                                                                                                         |  |

**Supplementary Table 2. Absorption values in  $C_{sat}$  measurements from Figure 1**

| Sample           | $A_{280}$       | $A_{260/280}$ | Corrected $A_{280}$ |
|------------------|-----------------|---------------|---------------------|
| TIA-1            | 0.69 0.66 0.80  | 0.64          |                     |
| TIA-1 + UC1      | 0.68 0.62 0.69  | 0.68          |                     |
| TIA-1 + TC1      | 0.64 0.64 0.63  | 0.67          |                     |
| TIA-1 + UC5      | 0.17 0.14 0.17  | 0.70          |                     |
| TIA-1 + TC5      | 0.18 0.21 0.19  | 0.68          |                     |
| TIA-1 + AAg*     | 0.73 0.80 0.72  | 1.08          | 0.54 0.51 0.51      |
| TIA-1 + dsTC5*   | 0.77 0.71. 0.77 | 1.03          | 0.59 0.61 0.58      |
| TIA-1 + TC5compl | 0.29 0.29 0.33  | 0.76          |                     |

\* Corrected for contribution from nucleic acid remaining in the supernatant

**Supplementary Table 3. Absorption values in  $C_{sat}$  measurements from Figure 4**

| Sample       | $A_{280}$       | $A_{260/280}$ | Corrected $A_{280}$ |
|--------------|-----------------|---------------|---------------------|
| TIA-1        | 0.70 0.76. 0.73 | 0.62          |                     |
| TIA-1 + TC1* | 0.87 0.88. 0.88 | 0.72          | 0.71 0.72 0.72      |
| TIA-1 + TC2  | 0.38 0.41 0.46  | 0.67          |                     |
| TIA-1 + TC3  | 0.36 0.38 0.38  | 0.68          |                     |
| TIA-1 + TC5  | 0.44 0.45 0.49  | 0.63          |                     |
| TIA-1 + TC7  | 0.37 0.37. 0.41 | 0.68          |                     |
| TIA-1 + TC9  | 0.39 0.43. 0.39 | 0.65          |                     |

\* Corrected for contribution from nucleic acid remaining in the supernatant
